# Supplementary material for: SAS-1 Is a C2 Domain Protein Critical for Centriole Integrity in C. elegans
Source: PubMed Central journal article supplement (PMC4238951; doi:10.1371/journal.pgen.1004777), 2014-11-20
Supplement: pgen.1004777.s008.pdf [file pgen.1004777.s008.pdf]

## A

### DIC phenotype in first cell cycle

| Maternal genotype          | Paternal genotype          | n  | First cycle monopolar |
|----------------------------|----------------------------|----|-----------------------|
| wild type                  | wild type                  | 10 | 0                     |
| <i>sas-1(t1476)</i>        | <i>sas-1(t1476)</i>        | 46 | 41 (89%)              |
| <i>sas-1(t1521)</i>        | <i>sas-1(t1521)</i>        | 16 | 16 (100%)             |
| <i>sas-1(t1476) / eDf2</i> | <i>sas-1(t1476) / eDf2</i> | 6  | 6 (100%) <sup>o</sup> |
| wild type                  | <i>sas-1(t1476)</i>        | 18 | 14 (78%)              |
| <i>sas-1(t1476)</i>        | wild type                  | 6  | 0                     |
| <i>sas-1(t1521)</i>        | wild type                  | 14 | 0                     |

## B

### DIC phenotype in second cell cycle if first cell cycle monopolar

| Maternal genotype          | Paternal genotype          | n                | Second cycle bipolar | Second cycle monopolar | Second cycle tripolar |
|----------------------------|----------------------------|------------------|----------------------|------------------------|-----------------------|
| wild type                  | wild type                  | 0                | 0                    | 0                      | 0                     |
| <i>sas-1(t1476)</i>        | <i>sas-1(t1476)</i>        | 33 <sup>oo</sup> | 24 (73%)             | 4 (12%)                | 5 (15%)               |
| <i>sas-1(t1521)</i>        | <i>sas-1(t1521)</i>        | 12               | 5 (42%)              | 4 (33%)                | 3 (25%)               |
| <i>sas-1(t1476) / eDf2</i> | <i>sas-1(t1476) / eDf2</i> | 2                | 0                    | 2 (100%)               | 0                     |
| wild type                  | <i>sas-1(t1476)</i>        | 14               | 14 (100%)            | 0                      | 0                     |

## C

### Embryonic viability

| Maternal genotype          | Paternal genotype          | n    | Viability (%) |
|----------------------------|----------------------------|------|---------------|
| wild type                  | wild type                  | 257  | 99            |
| <i>sas-1(t1476)</i>        | <i>sas-1(t1476)</i>        | 185  | 0             |
| <i>sas-1(t1521)</i>        | <i>sas-1(t1521)</i>        | 212  | 0             |
| <i>sas-1(t1476) / eDf2</i> | <i>sas-1(t1476) / eDf2</i> | 157  | 0             |
| <i>fog-2(q71)</i>          | <i>sas-1(t1476)</i>        | 1435 | 5             |

**Table S1**
