# Supplementary material for: SAS-1 Is a C2 Domain Protein Critical for Centriole Integrity in C. elegans
Source: PubMed Central journal article supplement (PMC4238951; doi:10.1371/journal.pgen.1004777), 2014-11-20
Supplement: pgen.1004777.s009.pdf [file pgen.1004777.s009.pdf]

## Occurrence of centriolar or centrosomal markers during pronuclear migration or meeting (PNM) / Mitosis

| IFA<br>indicated marker<br>MTOC | 3-2-2 | 3-2-0 | 3-1-1 | 2-3-3 | 2-2-2 | 2-2-1 | 2-1-2 | 2-1-1 | 2-1-0 | 2-0-0 | 1-2-2 | 1-2-1 | 1-1-1 | 1-1-2 | 1-0-1 | 1-1-0 | 1-1-1? | 1-1?-1 | 0-0-1 | 1?-1?-1? | 1-0-1? | 1?-0-0 | 1-0-0 |
|---------------------------------|-------|-------|-------|-------|-------|-------|-------|-------|-------|-------|-------|-------|-------|-------|-------|-------|--------|--------|-------|----------|--------|--------|-------|
| SPD-5                           |       |       |       |       | 3/0   |       |       |       |       | 0/2   | 3/3   |       |       |       |       |       |        |        |       |          |        |        |       |
| SPD-2                           |       |       |       | 1/0   | 0/1   |       | 0/1   | 0/1   |       | 1/2   | 4/5   | 0/1   |       | 3/0   | 1/0   |       |        |        |       |          | 0/1    |        |       |
| ZYG-1                           |       |       | 0/1   |       |       | 0/1   | 0/1   |       |       | 0/2   | 1/2   |       |       | 1/0   | 1/0   |       |        |        |       | 0/1      | 0/2    |        |       |
| SAS-6                           | 0/1   | 0/1   |       | 0/1   |       |       | 0/1   |       |       | 0/1   | 6/2   | 0/1   | 0/2   |       |       | 1/0   |        |        |       |          |        |        |       |
| SAS-5                           | 0/1   |       |       |       |       |       |       |       |       | 0/2   | 1/1   |       |       |       |       | 1/0   | 1/0    |        |       |          |        | 0/3    |       |
| SAS-4                           |       | 0/1   |       | 0/1   |       |       | 0/1   |       | 0/1   | 1/8   | 0/1   | 4/1   | 2/0   |       |       |       |        |        | 1/0   |          |        |        |       |

- acentriolar MTOC, very faint
- IFA very faint, ZYG-1 faint
- one MTOC very faint, SPD-2 and IFA very faint
- PNM: one MTOC, second centriolar signals of IFA and SPD-2 closeby but very faint
- PNM: both centriolar signals in same MTOC
- focused ZYG-1 signal more widespread than usual
- one MTOC with two centriolar foci
- one MTOC with no centriolar focus
- one IFA focus without ZYG-1 signal, second IFA focus with very faint ZYG-1
- two MTOCs, only one with SPD-2 PCM signal
- two MTOCs with one centriolar focus each, one MTOC with no signal at all
- two weak MTOCs without any centriolar SAS-6

**Table S2**
